# Supplementary material
Source: PubMed Central journal article supplement (PMC5198266)
Supplement: ASN.2015070772SupplementaryData.pdf [file ASN.2015070772SupplementaryData.pdf]

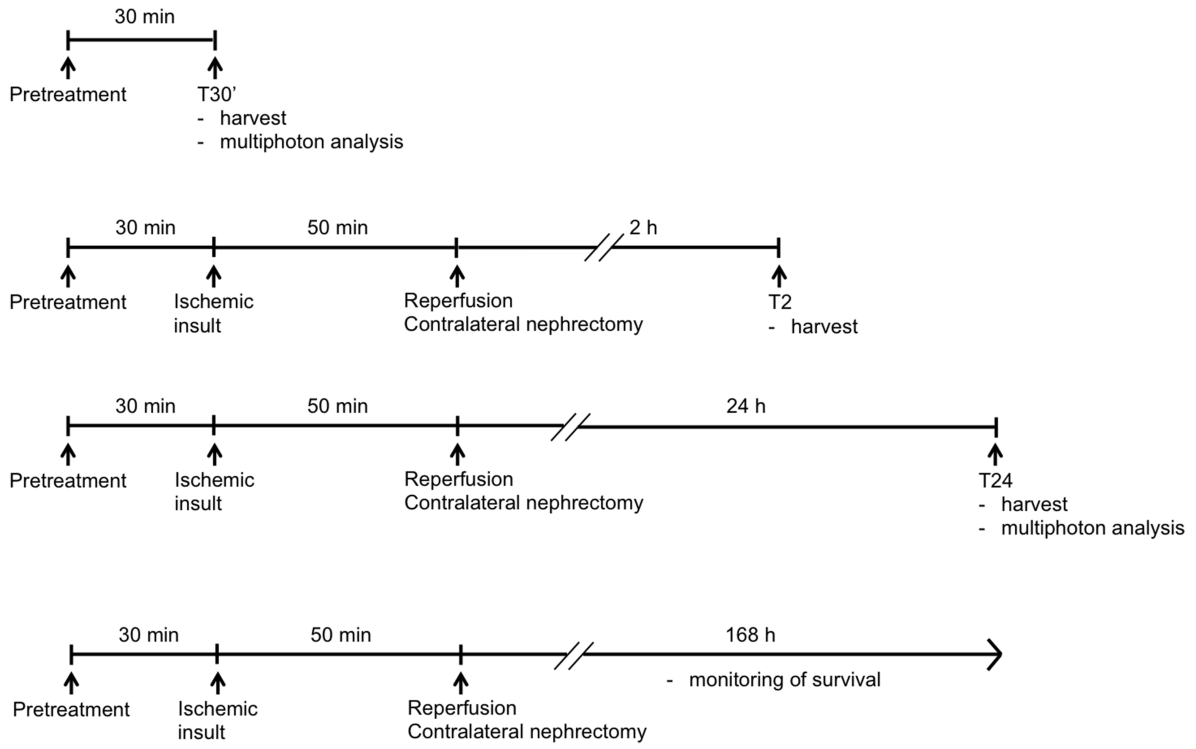

**Suppl. Figure 1. Experimental design**

|       | Forward primer 5'-3'       | Reverse primer 5'-3'       |
|-------|----------------------------|----------------------------|
| Ngal  | CAA GTG GCC GAC ACT GAC TA | GGT GGG AAC AGA GAAAAC GA  |
| Hif1a | AAG AAA CCG CTT ATG ACG TG | CCA CCT CTT TTT GCAAGC AT  |
| Kim1  | CGC AGA GAA ACC CGA CTA AG | CAA AGC TCA GAG AGC CCA TC |
| Gapdh | CAC CAC CAT GGA GAA GGC TG | GTC ATG GCA TGG ACT GTG    |

**Suppl. Table 1. Sequence of forward and reverse primers for RT-PCR**

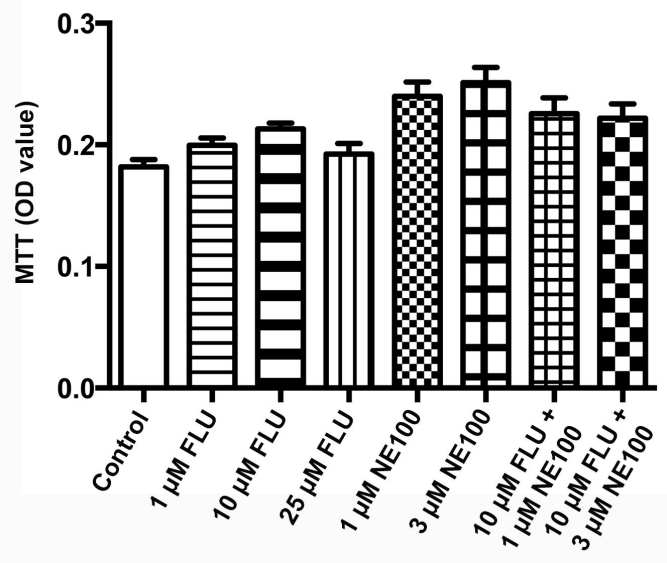

**Suppl. Figure 2. Cell viability assay**

MTT cell viability assay of HK-2 cells treated with various concentrations of FLU and NE100. n=6/group. Bars indicate means  $\pm$ SEM, data were analyzed by one-way ANOVA with Bonferroni's multiple comparison test.

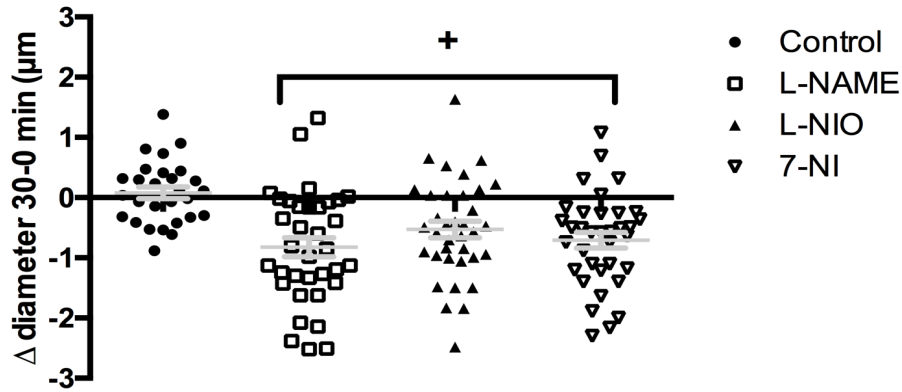

**Suppl. Figure 3. Vasoconstrictive effect of NOS inhibitors**

Changes in capillary diameters 30 min after non-selective NOS blocker L-NAME, selective eNOS blocker L-NIO and selective nNOS blocker 7-NI treatment in sham-operated rats.  $+P < 0.05$  versus Control,  $n = 3/\text{group}$ ,  $\sim 150$  capillaries/animal, data were analyzed by one-way ANOVA with Bonferroni's multiple comparison test.

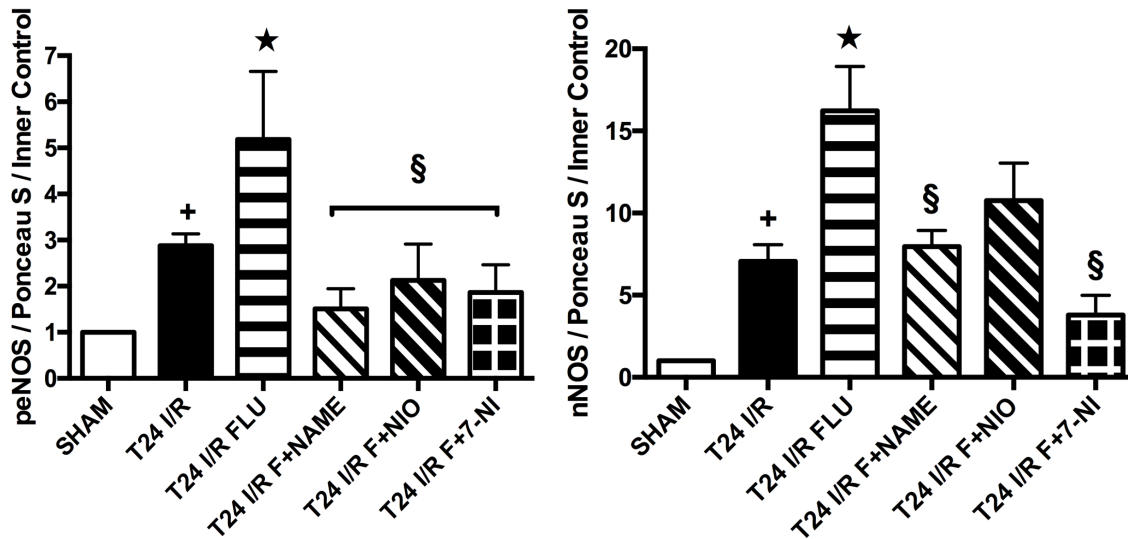

**Suppl. Figure 4.**

Immunoblot for renal peNOS and nNOS in rats treated with FLU and non-selective NOS-blocker L-NAME or selective eNOS-blocker L-NIO or selective nNOS-blocker 7-NI. + $P < 0.05$  versus SHAM; \* $P < 0.05$  versus T24 I/R; § $P < 0.05$  versus T24 I/R FLU. n=5-7/group. Bars indicate means  $\pm$  SEM, data were analyzed by one-way ANOVA with Bonferroni's multiple comparison test.
